# Supplementary material for: Chrysin Is Immunomodulatory and Anti-Inflammatory against Complete Freund’s Adjuvant-Induced Arthritis in a Pre-Clinical Rodent Model
Source: MDPI journal article supplement (doi:10.3390/pharmaceutics15041225), 2023-04-12
Supplement: s1 [file s1]

**Table S1.** The sequence of oligonucleotides used to check mRNA expression levels.

| Gene  | Primer sequence (5'–3')                  | Product size (bp) | Reference |
|-------|------------------------------------------|-------------------|-----------|
| TLR-2 | Forward: CCA GAT GGC CAG AGG ACT CA      | 212               | [36]      |
|       | Reverse: TGT GAG TCC CGA GGG AAT AGA     |                   |           |
| NF-κB | Forward: CAT GGC AGA CGA CGA TCC TT      | 127               | [65]      |
|       | Reverse: AAG GTA TGG GCC ATC TGT TGA     |                   |           |
| TNF   | Forward: ACA AGG CTG CCC CGA CTA T       | 67                | [65]      |
|       | Reverse: CTC CTG GTA TGA AGT GGC AAA TC  |                   |           |
| IL-4  | Forward: AAC ACC ACG GAG AAC GAG CTC ATC | 152               | [66]      |
|       | Reverse: AGT GAG TTC AGA CCG CTG ACA CCT |                   |           |
| IL-10 | Forward: AGA AGA GGG AGG AGC CTT TG      | 222               | [66]      |
|       | Reverse: GCC TTT GCT GGT CTT CAC TC      |                   |           |
| GAPDH | Forward: AGA GAC AGC CGC ATC TTC TT      | 494               | [65]      |
|       | Reverse: TGC ATT GCT GAC AAT CTT GA      |                   |           |

## References

36. Israr, M.; Naseem, N.; Akhtar, T.; Aftab, U.; Zafar, M.S.; Faheem, M.A.; Shahzad, M. Nimbolide attenuates complete Freund's adjuvant induced arthritis through expression regulation of toll-like receptors signaling pathway. *Phytother. Res.* **2023**, *37*(3), 903-912.
65. Aslam, A.; Sheikh, N.; Shahzad, M.; Saeed, G.; Fatima, N.; Akhtar, T. Quercetin ameliorates thioacetamide-induced hepatic fibrosis and oxidative stress by antagonizing the Hedgehog signaling pathway. *J Cell Biochem.* **2022**, *123*(8), 1356-1365.
66. Ahsan, H.; Irfan, H.M.; Alamgeer; Shahzad, M.; Asim, M.H.; Akram, M.; Zafar, M.S. (2021). Anti-rheumatic activity of pseudoephedrine (a substituted phenethylamine) in complete Freund's adjuvant-induced arthritic rats by down regulating IL-1 $\beta$ , IL-6 and TNF- $\alpha$  as well as upregulating IL-4 and IL-10. *Inflammopharmacology.* **2021**, *29*(3), 673–682
